# Supplementary material
Source: ML conference proceedings conference paper supplement (https://proceedings.mlr.press/v37/zhuc15.html)
Supplement: Supplementary file [file zhuc15-supp.pdf]

---

## Supplementary Material: A Hybrid Approach for Probabilistic Inference using Random Projections

---

### Appendix

**Proposition.** For any graphical model  $G$  and choice of parameters  $M \geq 1$ ,  $m \geq 1$ ,  $f \in (0, \frac{1}{2})$ ,  $p \in [0, 1]$ ,  $\frac{1}{M} \sum_{k=1}^M \left(\frac{2}{p+1}\right)^m Z^{(k)}$  is an unbiased estimator of the partition function  $Z$ . Furthermore, the variance of this estimator is bounded from above by the following expressions:

$$\begin{aligned} \text{Var} \left[ \frac{1}{M} \sum_{k=1}^M \left(\frac{2}{p+1}\right)^m Z^{(k)} \right] &\leq \frac{1}{M} \left( \frac{4(p + \frac{1}{2}(1-f)(1-p)^2)}{(p+1)^2} \right)^m Z^2 + \frac{1}{M} \left( \frac{2(p^2+1)}{(p+1)^2} \right)^m \sum_{x \in \mathcal{X}} w(x)^2 - \frac{Z^2}{M} \\ &\leq \frac{2}{M} \left( \frac{2(p^2+1)}{(p+1)^2} \right)^m Z^2 \end{aligned}$$

### Preliminaries

Before we prove the proposition, let us start off by proving some preliminaries. The key idea here is to relate the expected value of certain quantities involving the smoothed ( $p > 0$ ) XOR factor potentials  $\phi_{\{A_i^{(k)}, b_i^{(k)}\}}(x_{\{A_i^{(k)}\}})$  to the hard ( $p = 0$ ) XOR factor potentials  $\psi_{\{A_i^{(k)}, b_i^{(k)}\}}(x_{\{A_i^{(k)}\}})$ .

Define the random variable  $y_k(x) = \prod_{i=1}^m \phi_{\{A_i^{(k)}, b_i^{(k)}\}}(x_{\{A_i^{(k)}\}}) = \prod_{i=1}^m \phi_i(x)$  to be the product over all of the smoothed ( $p > 0$ ) XOR factor potentials, where we use  $\phi_i(x)$  as short-hand notation. Let  $\psi_i(x)$  be the hard XOR factor potential corresponding to  $\phi_i(x)$  for  $p = 0$ . By construction, we have that  $\phi_i(x) = p + (1-p)\psi_i(x)$ .

Recall that we proved  $\mathbb{E}[y_k(x)] = \left(\frac{p+1}{2}\right)^m$  in Section 3.1 as follows:  $\mathbb{E}[y_k(x)] = \mathbb{E}[\prod_{i=1}^m \phi_i(x)] = \prod_{i=1}^m \mathbb{E}[p + (1-p)\psi_i(x)] = \prod_{i=1}^m (p + (1-p)\frac{1}{2}) = \left(\frac{p+1}{2}\right)^m$ .

Similarly, we can prove that  $\mathbb{E}[y_k(x)^2] = \left(\frac{p^2+1}{2}\right)^m$  as follows:  $\mathbb{E}[y_k(x)^2] = \mathbb{E}[\prod_{i=1}^m \phi_i(x)^2] = \prod_{i=1}^m \mathbb{E}[\phi_i(x)^2] = \prod_{i=1}^m \mathbb{E}[(p + (1-p)\psi_i(x))^2] = \prod_{i=1}^m (p^2 + 2p(1-p)\frac{1}{2} + (1-p)^2\frac{1}{2}) = \left(\frac{p^2+1}{2}\right)^m$ .

Given two elements  $a, b \in \mathcal{X}$  with  $a \neq b$ , we can derive an expression for  $\mathbb{E}[y_k(a)y_k(b)]$  as follows:

$$\begin{aligned} \mathbb{E}[y_k(a)y_k(b)] &= \mathbb{E} \left[ \prod_{i=1}^m \phi_i(a)\phi_i(b) \right] \\ &= \prod_{i=1}^m \mathbb{E}[\phi_i(a)\phi_i(b)] \\ &= \prod_{i=1}^m \mathbb{E} \left[ (p + (1-p)\psi_i(a))(p + (1-p)\psi_i(b)) \right] \\ &= \prod_{i=1}^m \left( p + (1-p)^2 \mathbb{E}[\psi_i(a)\psi_i(b)] \right) \\ &= \sum_{t=0}^m \binom{m}{t} p^{m-t} (1-p)^{2t} \mathbb{E} \left[ \prod_{\text{any } t \text{ distinct indices}} \psi_{i_1}(a)\psi_{i_1}(b) \dots \psi_{i_t}(a)\psi_{i_t}(b) \right] \end{aligned}$$

where we used the fact that the expected value of the product over any  $t$  distinct indices  $\{i_1, \dots, i_t\}$  is equal by symmetry, which allows us to simplify the last expression.

### Proof

*Proof.* For convenience, define a scaling factor  $r = \frac{2}{p+1}$ .

The partition function of our randomly projected  $G^{(k)}$  is  $Z^{(k)} = \sum_{x \in \mathcal{X}} w(x) \prod_{i=1}^m \phi_{\{A_i^{(k)}, b_i^{(k)}\}}(x_{\{A_i^{(k)}\}}) = \sum_{x \in \mathcal{X}} w(x) y_k(x)$  with  $\mathbb{E}[Z^{(k)}] = \sum_{x \in \mathcal{X}} w(x) \mathbb{E}[y_k(x)] = \left(\frac{p+1}{2}\right)^m Z$ .

Using variance and expectation formulas, we have the following equalities:

$$\begin{aligned}
 \text{Var} \left[ \frac{1}{M} \sum_{k=1}^M r^m Z^{(k)} \right] &= \frac{r^{2m}}{M^2} \sum_{k=1}^M \text{Var}[Z^{(k)}] \\
 &= \frac{r^{2m}}{M^2} \sum_{k=1}^M \text{Var} \left[ \sum_{x \in \mathcal{X}} w(x) y_k(x) \right] \\
 &= \frac{r^{2m}}{M^2} \sum_{k=1}^M \left( \sum_{x \in \mathcal{X}} w(x)^2 \text{Var}[y_k(x)] + \sum_{x_i \in \mathcal{X}} \sum_{x_j \neq x_i} w(x_i) w(x_j) \text{Cov}[y_k(x_i), y_k(x_j)] \right) \\
 &= \frac{r^{2m}}{M^2} \sum_{k=1}^M \left( \sum_{x \in \mathcal{X}} w(x)^2 (\mathbb{E}[y_k(x)^2] - \mathbb{E}[y_k(x)]^2) \right. \\
 &\quad \left. + \sum_{x_i \in \mathcal{X}} \sum_{x_j \neq x_i} w(x_i) w(x_j) (\mathbb{E}[y_k(x_i) y_k(x_j)] - \mathbb{E}[y_k(x_i)] \mathbb{E}[y_k(x_j)]) \right) \\
 &= \frac{r^{2m}}{M^2} \sum_{k=1}^M \left( \left( \frac{p^2+1}{2} \right)^m \sum_{x \in \mathcal{X}} w(x)^2 + \sum_{x_i \in \mathcal{X}} \sum_{x_j \neq x_i} w(x_i) w(x_j) \mathbb{E}[(y_k(x_i) y_k(x_j))] \right) - \frac{Z^2}{M} \\
 &= \frac{r^{2m}}{M^2} \sum_{k=1}^M \sum_{x_i \in \mathcal{X}} \sum_{x_j \neq x_i} w(x_i) w(x_j) \mathbb{E}[(y_k(x_i) y_k(x_j))] + \frac{r^{2m}}{M} \left( \frac{p^2+1}{2} \right)^m \sum_{x \in \mathcal{X}} w(x)^2 - \frac{Z^2}{M}
 \end{aligned}$$

Let us focus on bounding the first term in the variance expression above,  $V_1$ . Using the lemma proved earlier with  $a = x_i, b = x_j$ , and  $x_j \neq x_i$ , we have that

$$\begin{aligned}
 V_1 &= \frac{r^{2m}}{M^2} \sum_{k=1}^M \sum_{x_i \in \mathcal{X}} \sum_{x_j \neq x_i} w(x_i) w(x_j) \mathbb{E}[(y_k(x_i) y_k(x_j))] \\
 &= \frac{r^{2m}}{M} \sum_{x_i \in \mathcal{X}} \sum_{x_j \neq x_i} w(x_i) w(x_j) \left( \sum_{t=0}^m \binom{m}{t} p^{m-t} (1-p)^{2t} \mathbb{E} \left[ \prod_{\text{any } t \text{ distinct indices}} \psi_{i_1}(x_i) \psi_{i_1}(x_j) \dots \psi_{i_t}(x_i) \psi_{i_t}(x_j) \right] \right) \\
 &= \frac{r^{2m}}{M} \sum_{t=0}^m \binom{m}{t} p^{m-t} (1-p)^{2t} \left( \sum_{x_i \in \mathcal{X}} \sum_{x_j \neq x_i} w(x_i) w(x_j) \mathbb{E} \left[ \prod_{\text{any } t \text{ distinct indices}} \psi_{i_1}(x_i) \psi_{i_1}(x_j) \dots \psi_{i_t}(x_i) \psi_{i_t}(x_j) \right] \right)
 \end{aligned}$$

### Hashing with Low-Density (Sparse) Parity Constraints

Recall that in the construction of our hash functions in Section 3.1, we let  $A_{i,j} = 1$  if node  $j$  is included in the  $i^{\text{th}}$  XOR constraint and  $A_{i,j} = 0$  otherwise, and we let  $b_i$  be the parity bit generated for the  $i^{\text{th}}$  XOR constraint. The process for randomly generating  $A, b$  ( $A_{i,j}^{(k)} \stackrel{iid}{\sim} \text{Bernoulli}(f)$  and  $b_i^{(k)} \stackrel{iid}{\sim} \text{Bernoulli}(\frac{1}{2})$ ) is designed to give us sparse parity constraints. Given the set of  $m$  XOR constraints, a configuration  $x \in \mathcal{X}$  satisfies the set of XOR constraints if and only if  $Ax \equiv b \pmod{2}$ .

Adapting the proof of Theorem 3 in *Low-density Parity Constraints for Hashing-Based Discrete Integration* (Ermon et al., 2014) and letting  $A_{\{i_1, \dots, i_t\}}$  and  $b_{\{i_1, \dots, i_t\}}$  be the  $t$  rows of  $A$  and  $b$ , respectively, corresponding to the  $t$  parity constraints inside the expectation, the expression we have can be written as:

$$\begin{aligned}
 & \sum_{x_i \in \mathcal{X}} \sum_{x_j \neq x_i} w(x_i)w(x_j) \mathbb{E} \left[ \prod_{\text{any } t \text{ distinct indices}} \psi_{i_1}(x_i)\psi_{i_1}(x_j) \dots \psi_{i_t}(x_i)\psi_{i_t}(x_j) \right] \\
 = & \sum_{x_i \in \mathcal{X}} w(x_i) \sum_{x_j \neq x_i} w(x_j) \mathbb{P}[A_{\{i_1, \dots, i_t\}}x_i + b_{\{i_1, \dots, i_t\}} = \vec{0}_t, A_{\{i_1, \dots, i_t\}}x_j + b_{\{i_1, \dots, i_t\}} = \vec{0}_t] \\
 = & 2^{-t} \sum_{x_i \in \mathcal{X}} w(x_i) \sum_{s=1}^n W_{x_i}(s) r^{(s,f)}(0, 0) \\
 = & 2^{-2t} \sum_{x_i \in \mathcal{X}} w(x_i) \sum_{s=1}^n W_{x_i}(s) \left( 1 + (1 - 2f)^s \right)^t \\
 \leq & 2^{-2t} (2 - 2f)^t \sum_{x_i \in \mathcal{X}} w(x_i) \sum_{s=1}^n W_{x_i}(s) \\
 \leq & 2^{-t} (1 - f)^t Z^2
 \end{aligned}$$

where  $W_{x_i}(s)$  is the sum of  $w(x_j)$  for all  $x_j$  at Hamming distance  $s$  from  $x_i$  and we used the fact that  $r^{(s,f)}(0, 0) \leq r^{(1,f)}(0, 0)$ .

**Proof (continued)**

The bound for our first term is

$$\begin{aligned}
 V_1 &= \frac{r^{2m}}{M} \sum_{t=0}^m \binom{m}{t} p^{m-t} (1-p)^{2t} \left( \sum_{x_i \in \mathcal{X}} \sum_{x_j \neq x_i} w(x_i)w(x_j) \mathbb{E} \left[ \prod_{\text{any } t \text{ distinct indices}} \psi_{i_1}(x_i)\psi_{i_1}(x_j) \dots \psi_{i_t}(x_i)\psi_{i_t}(x_j) \right] \right) \\
 &\leq \frac{r^{2m}}{M} \sum_{t=0}^m \binom{m}{t} p^{m-t} (1-p)^{2t} \left( 2^{-t} (1-f)^t Z^2 \right) \\
 &= Z^2 \frac{r^{2m}}{M} \sum_{t=0}^m \binom{m}{t} p^{m-t} \left( \frac{1}{2} (1-f)(1-p)^2 \right)^t \\
 &= Z^2 \frac{r^{2m}}{M} \left( p + \frac{1}{2} (1-f)(1-p)^2 \right)^m \\
 &\leq Z^2 \frac{r^{2m}}{M} \left( p + \frac{1}{2} (1-p)^2 \right)^m \\
 &= Z^2 \frac{r^{2m}}{M} \left( \frac{p^2 + 1}{2} \right)^m
 \end{aligned}$$

The final bound for our variance becomes

$$\begin{aligned}
 \text{Var} \left[ \frac{1}{M} \sum_{k=1}^M r^m Z^{(k)} \right] &\leq Z^2 \frac{r^{2m}}{M} \left( \frac{p^2 + 1}{2} \right)^m + \frac{r^{2m}}{M} \left( \frac{p^2 + 1}{2} \right)^m \sum_{x \in \mathcal{X}} w(x)^2 - \frac{Z^2}{M} \\
 &\leq Z^2 \frac{2}{M} r^{2m} \left( \frac{p^2 + 1}{2} \right)^m \\
 &= Z^2 \frac{2}{M} \left( \frac{2(p^2 + 1)}{(p + 1)^2} \right)^m
 \end{aligned}$$

□

## References

Ermon, Stefano, Gomes, Carla P., Sabharwal, Ashish, and Selman, Bart. Low-density parity constraints for hashing-based discrete integration. In *Proc. of the 31st International Conference on Machine Learning (ICML)*, pp. 271–279, 2014.
